1 Distinct timescales for the neuronal encoding of vocal signals in a high-order auditory area

2 Cazala Aurore<sup>1</sup>, Del Negro Catherine<sup>1</sup>, Giret Nicolas<sup>1\*</sup>

3 <sup>1</sup>Université Paris-Saclay, CNRS, Institut des neurosciences Paris-Saclay, 91400 Orsay, France

4 \*Correspondence should be addressed to Nicolas Giret at [nicolas.giret@universite-paris-](mailto:nicolas.giret@universite-paris-saclay.fr)  
5 [saclay.fr](mailto:nicolas.giret@universite-paris-saclay.fr)

6

7 Abstract

8 The ability of the auditory system to selectively recognize natural sound categories with a  
9 tolerance to variations within categories is thought to be crucial for vocal communication.  
10 Subtle variations, however, may have functional roles. To date, how the coding of the balance  
11 between tolerance and sensitivity to variations in acoustic signals is performed at the neuronal  
12 level requires further studies. We investigated whether neurons of a high-order auditory area  
13 in a songbird species, the zebra finch, are sensitive to natural variations in vocal signals by  
14 recording responses to repeated exposure to similar and variant sound sequences. We took  
15 advantage of the intensive repetition of the male songs which subtly vary from rendition to  
16 rendition. In both anesthetized and awake birds, responses based on firing rate during sequence  
17 presentation did not show any clear sensitivity to these variations, unlike the temporal  
18 reliability of responses based on a 10 milliseconds resolution that depended on whether variant  
19 or similar sequences were broadcasted and the context of presentation. Results therefore  
20 suggest that auditory processing operates on distinct timescales, a short one to detect variations  
21 in individual's vocal signals, longer ones that allow tolerance in vocal signal structure and the  
22 encoding of the global context.

23

24

25

## 26 Introduction

27 Vocal communication signals may provide rich information through both their acoustic  
28 structure and subtle variations in their acoustic features<sup>1,2</sup>. A given word spoken by various  
29 people convey information about its meaning through an invariant acoustic structure among  
30 uttered signals. It may also provide information about the gender, the emotional state and the  
31 individual identity of the emitter through fine variations in temporal and acoustic features of  
32 uttered signals across individuals. Vocal communication is therefore a computational  
33 challenge, requiring the auditory system to selectively extract invariant information with a  
34 tolerance to variations for categorization but with sensitivity to variations that potentially  
35 provide supplementary information<sup>3</sup>. Within this framework, how the balance between  
36 tolerance and sensitivity to subtle variations in acoustic signals is encoded at the neuronal level  
37 within the auditory system still require further investigations<sup>4-6</sup>.

38 Songbirds offer a powerful model to explore neural coding principles underlying this  
39 balance. Birdsong is a complex multiple cues signal that is pertinent to species identity and  
40 exhibits subtle variations that may carry information such as group or individual identity,  
41 emotional or motivational state or physical conditions<sup>7,8</sup>. Among songbird species, the zebra  
42 finch is very well suited for investigating how subtle variations encompassed within highly  
43 similar communication sounds are encoded within the auditory system. The male zebra finch  
44 typically produces a single individual-specific stereotyped song motif that includes several  
45 distinctive sound elements, called syllables, that are always produced in the same order<sup>9</sup>. In  
46 spite of high stereotypy in their acoustic structure, motifs vary from rendition to rendition with  
47 a degree of variations carrying information about the social context, *i.e.* the presence or absence  
48 of females<sup>10</sup>. Also, a recent study provides evidence that subtle variations can be perceived by  
49 zebra finches<sup>11</sup>. Male zebra finches intensively repeat their song everyday while repetition of  
50 the same stimulus is well-known to elicit habituation in behavioral and neural responses raising  
51 the question whether variations could have an impact on these changes in responses.

52 In songbirds, the processing of complex behaviorally relevant acoustic signals,  
53 including calls and songs, involves an auditory area analogous to secondary auditory cortex in  
54 mammals, the caudomedial nidopallium (NCM), that is a good candidate for investigating how  
55 the balance between tolerance and sensitivity to subtle variations in acoustic signals is  
56 encoded<sup>3</sup>. Neurons in this auditory area display a clear preference for natural over artificial  
57 sounds. Regarding conspecific vocal signals, they may exhibit invariant responses to call

58 categories<sup>12,13</sup>. In spite of this tolerance to variations in vocal signals, neurons in NCM also  
59 support recognition of familiar vocalizations that only differ in fine acoustic detail among their  
60 categories<sup>14–16</sup>. Neurons in NCM also display stimulus-specific adaptation during which the  
61 repeated exposure to a given auditory stimulus induces a decrease in responses and the  
62 exposure to a novel stimulus or to the same stimulus with a different order of the sound  
63 elements resets responses<sup>15,17–20</sup>. To date, this phenomenon, interpreted as reflecting memory  
64 formation, was reported only in experiments in which the exactly same sound stimuli were  
65 repeatedly presented. However, in the wild, individuals are never exposed to similar vocal  
66 signals as fine natural variations in acoustic features always occur across renditions, raising the  
67 question whether these variations might affect neuronal responses in NCM and their time  
68 course. Based on extracellular recordings in both anesthetized and awake zebra finches, we  
69 show a clear impact of these subtle variations on neuronal responses driven by sequences of  
70 song elements that either varied in acoustic details or remained the same across renditions. This  
71 impact was observed in spike timing and at a short temporal resolution reflecting a temporal  
72 integration of acoustic features across different time scales.

73

## 74 **Results**

75 To explore the neuronal sensitivity to subtle acoustic variations across renditions of vocal  
76 signals in a high-order auditory area, we performed extracellular recordings of NCM neurons  
77 in awake zebra finches (n=4 birds) while playing back sequences built from individual's song  
78 syllables. These sequences were arranged in two different sound series, the ABAB-Same and  
79 the ABAB-Var series, both consisting of two song syllables, called A and B, repeated twice  
80 alternatively to form an ABAB sequence. The ABAB-Same series were built from 60  
81 repetitions of a single ABAB sequence while the ABAB-Var series from 60 natural variants of  
82 a given ABAB sequence (Fig. 1a-c). The similarity in fine acoustic structure of A or B syllables  
83 from one sequence variant to another was evaluated using the percent accuracy score in Sound  
84 Analysis Pro 2011<sup>21</sup>. Renditions of A or B syllables from one variant to another in ABAB-Var  
85 sequences were, on average, 83.2% and 81.9% similar, respectively, while, in comparison A  
86 and B syllables within a given sequence were significantly less similar, on average 73.5% in  
87 ABAB-Same sequences and 68.8% in ABAB-Var sequences (t-tests,  $p < 0.001$ ; Fig. 1c).

88

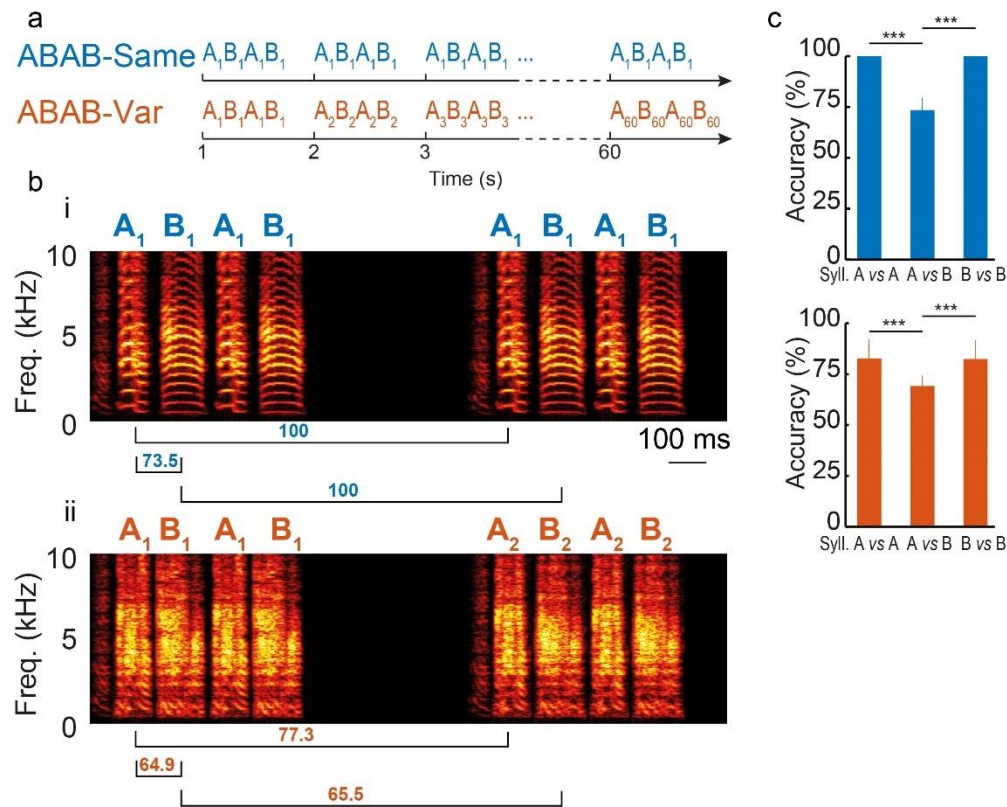

Figure 1

89

## 90 No effect of acoustic variations on response strength in awake birds

91 To assess auditory responses to playbacks of ABAB-Same and ABAB-Var series in awake  
92 birds, we performed three (range: 2-5) recording sessions (3.6 electrodes per recording session,  
93 range 2-7) per bird, with 4.5 days (range 1-9) between two successive recording sessions. We  
94 analyzed the spiking activity of 56 recording sites, located from the dorsorostral portion  
95 (maximal depth 2000  $\mu$ m) to the dorsocaudal portion<sup>20</sup>. They were driven by the playback of  
96 the ABAB-Same and ABAB-Var sequences, as illustrated by the example unit on Fig. 2a-b.

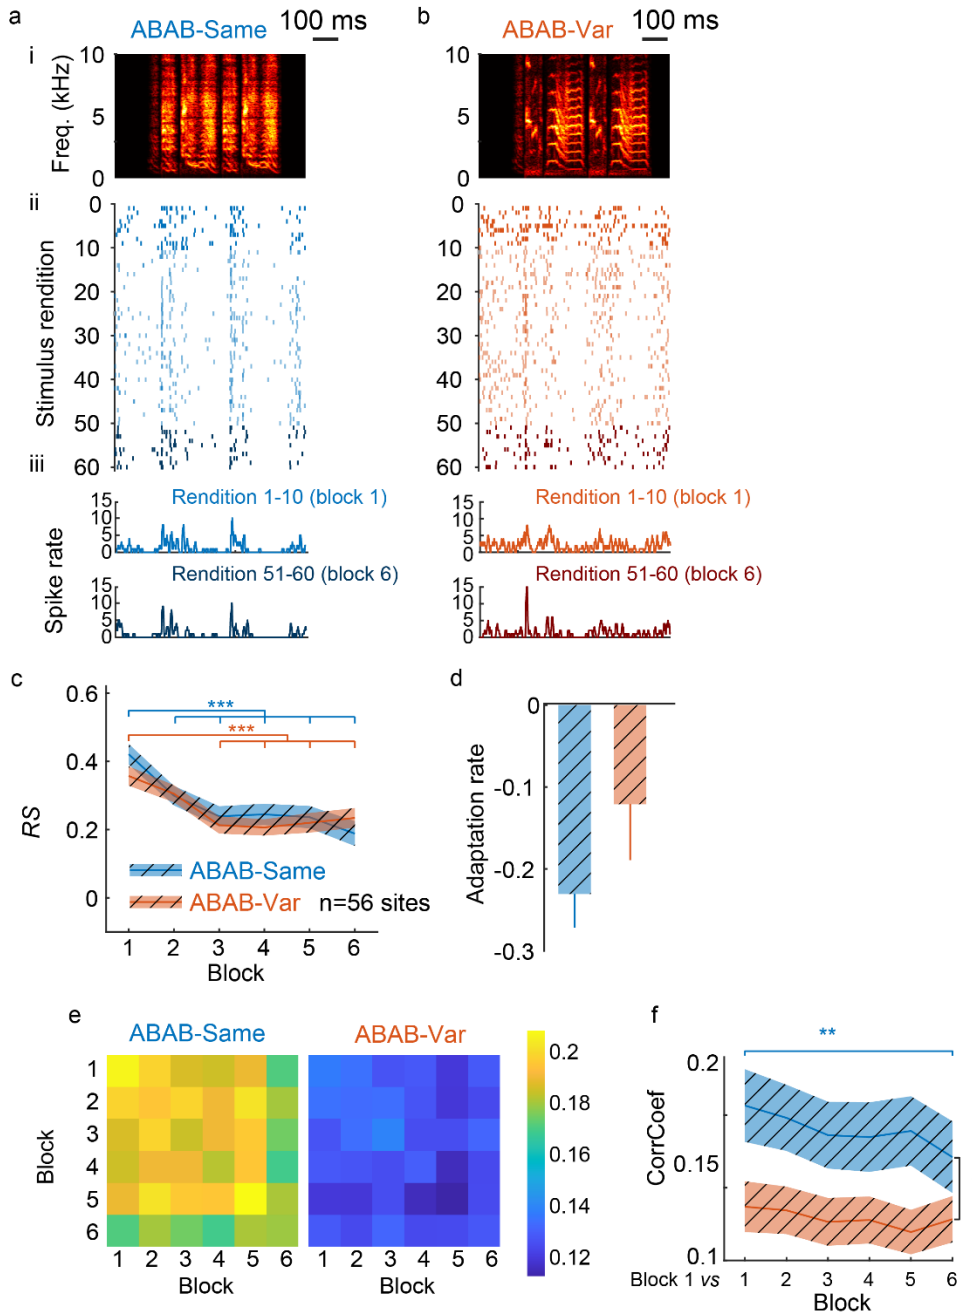

Figure 2

97

98 To examine whether the time course of auditory responses differed between the ABAB-Same  
99 and the ABAB-Var series, we performed a repeated-measures (RM) ANOVA on the response  
100 strength (*RS*), computed from firing rates averaged over the entire sequence duration, using a  
101 linear mixed-effect model with sequence type and block repetition as cofactors and units as a  
102 random factor (Fig. 2c). We used the term “block” because data were averaged over 10 trials,  
103 but all trials were delivered at the same frequency, one trial per second. Results indicated that  
104 response strength did not differ between ABAB-Same and ABAB-Var series (sequence type

105 factor;  $F_{1, 564} = 0.03$ ,  $p = 0.85$ ). Numerous studies have reported a stimulus-specific adaptation  
106 of auditory responses in NCM when the playbacks of conspecific vocalizations are  
107 repeated<sup>15,17,19,20,22</sup>. The RM ANOVA revealed an effect of block repetition factor on *RS* values  
108 ( $F_{5, 564} = 30.38$ ,  $p < 0.0001$ ) with a decrease in the strength of responses to both series (post-  
109 hoc tests: ABAB-Same: block 1 vs. block 2 to 6 all  $p < 0.001$ ; ABAB-Var: block 1 vs. block 3  
110 to 6, all  $p < 0.001$ ). Statistical analysis also revealed a significant interaction between block  
111 repetition and series type factors ( $F_{5, 564} = 2.26$ ,  $p = 0.047$ ) suggesting that the time course of  
112 auditory responses over the 60 renditions of ABAB sequences depended on whether acoustic  
113 features of syllables varied or not. Responses changed dramatically over the first stimulus  
114 presentations<sup>22</sup>. Here, NCM neurons displayed a significant decrease in their activity from the  
115 first block to the second one when ABAB-Same series were played back, leading us to examine  
116 whether responses of NCM neurons adapted more rapidly to the ABAB-Same series than to  
117 the ABAB-Var ones. We computed the adaptation rate for both sequences by extracting the  
118 slope of the linear regression over the 10 first stimulus renditions for each unit, as in several  
119 previous studies<sup>17,23–25</sup>. Although the average adaptation rate was higher for ABAB-Same than  
120 ABAB-Var sequences (Fig. 2d), it did not significantly differ ( $t_{1, 55} = 1.18$ ,  $p = 0.24$ ). These  
121 results therefore indicate no clear effect of rendition-to-rendition acoustic variations in syllable  
122 features on the time course of neuronal responses.

123

## 124 **Impact of acoustic variations in spike-timing reliability in awake birds**

125 We analyzed the temporal pattern of auditory responses by computing the trial-to-trial  
126 reliability coefficient, the CorrCoef. High CorrCoef values indicate a high spike train reliability  
127 across trials while low CorrCoef values mean great variations in temporal patterns of spike  
128 trains. This coefficient was calculated using responses over 20 presentations, the ten  
129 presentations of sequence stimuli of the a given block and those of each of the 6 blocks. Results  
130 indicated that CorrCoef values varied between [-0.07 and 0.69] with an average of 0.13, which  
131 is in the range usually reported for cortical<sup>26–28</sup> and NCM neurons<sup>20</sup>.

132 Analyses of CorrCoef values revealed an impact of series type and block repetition (linear  
133 mixed effect model, RM ANOVA; series type factor;  $F_{1, 110} = 4.73$ ,  $p = 0.032$ ; block repetition  
134 factor,  $F_{5, 550} = 3.62$ ,  $p = 0.003$ ). The trial-to-trial spike-timing reliability was significantly  
135 lower when ABAB-Var series were played back (Fig 2e) suggesting greater variations in spike-  
136 timing of responses when sequences consisted of ABAB variants than when the same sequence



137 was repeatedly played back. Post-hoc tests focused on comparisons between the first block and  
138 the other ones revealed that the trial-to-trial reliability of spike trains was modulated by the  
139 repetition of the same ABAB sequence, CorrCoef values significantly decreasing with  
140 sequence renditions (Fig 2f; block 1/block 1 vs. block1/block 6;  $p = 0.0027$ ). In contrast, the  
141 trial-to-trial reliability of spike trains evoked by variants in ABAB-Var series remained lower  
142 and stable ( $p > 0.68$ ; see heatmaps on Fig. 2e). The accuracy of spike timing continued to vary  
143 considerably throughout the exposure to the variants.

144

### 145 **Auditory responses to variant and similar sequences in anesthetized birds**

146 Extracellular recordings in NCM were also performed in seven isoflurane-anesthetized adult  
147 males. Only well-isolated responsive single units ( $n=82$ ) were selected (example unit on Fig.  
148 3a-b). These single units were from the dorsorostral portion (maximal depth 2000  $\mu\text{m}$ ) to the  
149 dorsocaudal portion and they were driven by the playback of the ABAB-Same and the ABAB-  
150 Var series.

151 The RM ANOVA performed on *RS* values revealed that they differed between ABAB-Same  
152 and ABAB-Var series over the six blocks (series type factor:  $F_{1, 1055} = 12.87$ ,  $p = 0.0003$ ).  
153 However, auditory responses did not differ when comparisons were focused on each block  
154 (post-hoc tests; all  $p > 0.64$ ). As in awake birds, neuronal responses showed the well-described  
155 adaptation across stimulus presentations (block repetition factor:  $F_{5, 1055} = 13.02$ ,  $p < 0.0001$ ).  
156 Both series induced a significant decrease over block repetitions (ABAB-Same series: block 1  
157 vs. block 3,4, 5 and 6, all  $p < 0.01$ ; ABAB-Var series: block 1 vs. block,  $p < 0.0021$ , block 1 vs.  
158 block 3, 4, 5 and 6,  $p < 0,01$ ) with no difference in adaptation rate over the ten first trials ( $F_{1, 81}$   
159  $= 0.74$ ,  $p = 0.46$ ). Therefore, subtle variations in acoustic features of syllables in ABAB-Var  
160 series had no clear impact on responses on the basis of firing rate measures.

161 Two cell types can be distinguished in NCM<sup>3,20,29-31</sup>. Responsive NCM neurons were split into  
162 two populations according to the peak-to-peak width of their action potential: neurons with  
163 broad spikes ( $\geq 0.3$  ms;  $n = 40$ , width =  $0.49 \pm 0.10$  ms) and neurons with narrow spikes ( $< 0.3$   
164 ms;  $n = 42$ , width =  $0.27 \pm 0.07$  ms). The RM ANOVA performed on *RS* values according to  
165 the block repetition revealed a significant decrease in response strength of both cell types  
166 (broad-spike cells, linear-mixed effect:  $F_{5,428} = 9.29$ ,  $p < 0.0001$ ; narrow-spikes cells, linear-  
167 mixed effect:  $F_{5,448} = 5.01$ ,  $p < 0.0003$ ) and a significant series type effect for narrow-spikes

168 cells (broad-spike cells, series type factor:  $F_{1,428} = 3.10, p = 0.08$ ; narrow-spikes cells, series  
 169 type factor:  $F_{1,448} = 7.72, p < 0.006$ ), but no significant interaction between the two factors for  
 170 both cell types (broad-spike cells,  $F_{5,428} = 0.53, p = 0.75$ ; narrow-spikes cells,  $F_{5,448} = 0.55, p =$   
 171  $0.73$ ). When the analysis was focused on the first ten renditions of the first block, both cell  
 172 types did not show any effect of natural variations on adaptation rate (broad-spike cells, paired  
 173 t-test:  $t_{38} = 1.39, p = 0.17$ ; narrow-spike cells, paired t-test:  $t_{40} = 0.26, p = 0.79$ ; note that for  
 174 both cell types, one unit was removed because it did not spike during the first trial).

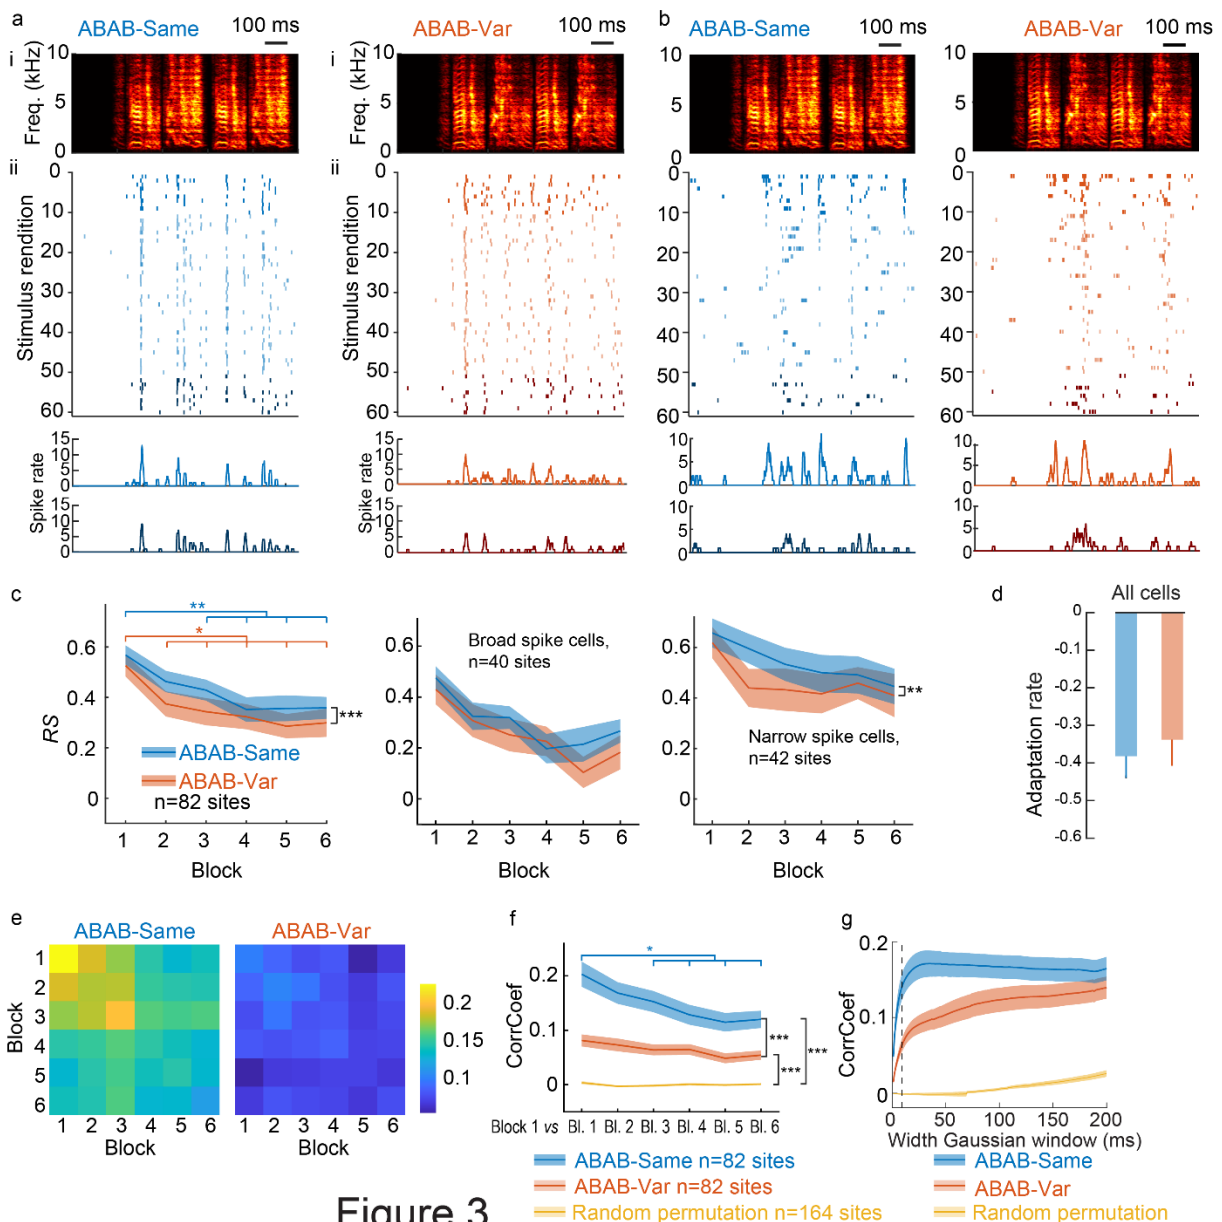

Figure 3

175

176 **Impact of acoustic variations in spike-timing reliability in anesthetized birds**



177 We also evaluated the spike timing reliability across blocks of sequence presentations by  
178 computing the CorrCoef. Most of the results are consistent with those obtained in awake birds.  
179 As illustrated by Fig. 3e-f, CorrCoef values were higher for ABAB-Same than for ABAB-Var  
180 series (series type,  $F_{1, 891} = 199.32$ ,  $p < 0.0001$ ; Fig. 3f) suggesting that spike trains were more  
181 reliable across the iterations of the same sequence than across the renditions of variants.  
182 Importantly, CorrCoef values of spike trains evoked by variants were significantly higher than  
183 CorrCoef values of spike trains in which inter-spike times were randomly distributed (RM  
184 ANOVA, series type:  $F_{2,1869} = 501.09$ ,  $p < 0.0001$ ; post-hoc test: ABAB-Same *vs* Random  
185 permutation,  $p < 0.0001$ ; ABAB-Var *vs* Random permutation,  $p < 0.0001$ ; yellow line in Fig.  
186 3f). This points out a certain degree of trial-to-trial reliability in spike trains evoked by variants.

187 Spike train reliability gradually decreases reaching a significant decrease from the third block,  
188 when the same sequence within ABAB-Same series was repeatedly played back (block  
189 repetition factor:  $F_{5, 891} = 10.52$ ,  $p < 0.001$ ; block 1 *vs* block 2:  $p = 0.31$ ; block 1 *vs* block 3:  $p$   
190  $= 0.024$ ; block 1 *vs* block 4 to 6: multiple  $p < 0.001$ ; Fig. 3d). Such decrease in CorrCoef values  
191 was not observed when ABAB-Var series were used as stimuli (multiple  $p > 0.13$ ; Fig. 3f).  
192 Therefore, as in awake birds, the temporal reliability of spike trains remained stable, showing  
193 no clear effect of the repeated exposure to sequence variants.

194 Here, CorrCoef were computed after applying a convolution on spike trains with a 10 ms  
195 Gaussian window width, a time resolution considered as optimal for discrimination of  
196 conspecific songs in auditory structures<sup>28,32,33</sup>. Using this 10 ms time resolution, CorrCoef  
197 results showed a sensitivity to natural variations in individual's vocal signals that failed to show  
198 results based on firing rates averaged over the several hundreds of milliseconds of the whole  
199 sequence duration. To bridge the gap between the two timescales, 10 milliseconds *vs.* several  
200 hundreds of milliseconds, we computed CorrCoef varying the width of the Gaussian window  
201 from 1 to 200 milliseconds. Importantly, as the width of the Gaussian window increases, spike  
202 trains are more and more smoothed and so, the trial-to-trial reliability of spike trains becomes  
203 increasingly based on firing rate rather than on spike timing accuracy. Our aim was to  
204 determine the time resolution where CorrCoef values did no longer differ between the two  
205 series. As shown in Fig. 3g, while CorrCoef values reached a plateau with a Gaussian window  
206 width at about 10 ms when ABAB-Same series were played back (Fig. 3g), CorrCoef values  
207 remained lower up to 170 ms for spike trains evoked by variants, both CorrCoef values being  
208 always much higher than after a random permutation of the spike times. As the time scale was  
209 increasing, the difference in CorrCoef values between ABAB-Same and -Var was decreasing

210 with no significant difference when the width of the Gaussian window was higher than 98 ms  
211 (linear mixed-effect models at each time point). This suggests that sensitivity to natural subtle  
212 variations in acoustic features across variant renditions requires a short time scale (< 100 ms)  
213 that fits within the duration range of syllables [63.5 – 203.6 ms] used to form sequences in the  
214 present study.

215

## 216 **No relationships between responses and variations in auditory stimuli**

217 Variations in temporal and acoustic syllable features across variant renditions offered us the  
218 possibility to examine to what extent the trial-to-trial variability in spike train accuracy relied  
219 on the degree of variations in syllable features across renditions. To address this issue, we  
220 examined to what extent variations in syllable length contributed to the reliability of spike  
221 trains by performing a linear time warping that allows aligning all spike-trains evoked by  
222 individual A and B syllables of ABAB-Var series on a common time axis (see Methods). This  
223 method reduces variability in the alignment of syllables onset and offset. A paired t-test on  
224 CorrCoef values obtained after comparing spike trains between blocks revealed that time  
225 warping significantly changed CorrCoef values ( $t_{20} = -2.60$ ,  $p = 0.017$ ). However, this change  
226 was small, CorrCoef values being marginally changed after time warping (before:  $0.081 \pm 0.01$   
227 vs after:  $0.083 \pm 0.01$ , mean  $\pm$  STD) and CorrCoef values remained significantly different  
228 between ABAB-Same and -Var series after time warping (mean  $\pm$  STD =  $0.16 \pm 0.026$ ;  $t_{20} =$   
229  $-17.6$ ,  $p < 0.0001$ ). Variations in syllable length therefore explained only a small part of the  
230 lower reliability of spike trains evoked by ABAB-Var series. We then assessed whether the  
231 more two variants were acoustically different, the lower the reliability of spike trains evoked  
232 by these two variants. Similarity scores, entropy and pitch differences between the first  
233 sequence and the 59 subsequent ones in ABAB-Var series were computed using Sound  
234 Analysis Pro<sup>21</sup>. In parallel, we calculated CorrCoef values between the spike train evoked by  
235 the first sequence of the ABAB-Var series used as stimulus and those evoked by the 59 others.  
236 Similarity score that describes the acoustic similarity of a pair of sound stimuli based on several  
237 acoustic parameters confirmed the subtle variations in fine acoustic structure of syllables, this  
238 measure (mean  $\pm$  SD:  $96.32\% \pm 3.60$ , range: [54-100 %]). Linear regressions based on either  
239 similarity scores, entropy or pitch differences and CorrCoef values did not reveal any  
240 significant correlations ( $p > 0.15$ ; Fig 4b-d). Thus, results did not show any relationships  
241 between trial-to trial reliability of spike trains and the degree of variability in acoustic features

242 across renditions. These results therefore provide additional support for a non-linear processing  
243 of acoustic features<sup>20,29,34–36</sup>.

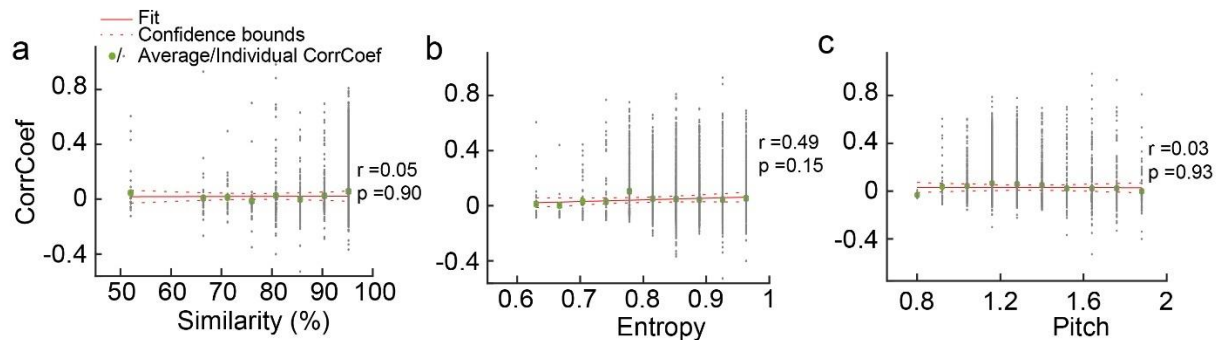

244 Figure 4

244

### 245 Effect of context on the repetition of the AB pair within sequences

246 Neurons in NCM are sensitive to sequence ordering and context<sup>20,29</sup>. Sequence stimuli used in  
247 ABAB-Same and ABAB-Var series were all built from a given pair of AB syllables repeated  
248 twice. What differed between ABAB-Same and ABAB-Var series was the context in which  
249 ABAB sequences occurred: the same sequence vs. various versions of the sequence. We took  
250 advantage of the repetition of a given AB pair within sequences and the difference in context  
251 between the two series to assess whether the type of context affected responses to the second  
252 rendition of AB pair within ABAB sequences. In awake birds, analyses of *RS* values revealed  
253 a significant decrease in responses with AB pair repetition within sequences of both series  
254 ( $F_{1,172} = 5.90$ ,  $p < 0.02$ ; Fig. 5a) but with no difference between the two series ( $F_{1,172} = 0.32$ ,  $p$   
255  $= 0.57$ ) and no significant interaction between the two factors ( $F_{1,172} = 3.34$ ,  $p = 0.07$ ). Analyses  
256 of spike timing accuracy using CorrCoef values also pointed out an impact of AB pair repetition  
257 on responses ( $F_{1,172} = 24.42$ ,  $p < 0.0001$ ; Fig. 5b). Interestingly, the effect of AB pair repetition  
258 was observed when ABAB-Same as well as ABAB-Var series were played back (post-hoc  
259 tests,  $p < 0.01$  and  $p < 0.001$ , respectively) indicating that, even if CorrCoef values for spike  
260 trains evoked by ABAB-Var series were low, they could reveal changes in spike train accuracy.  
261 The temporal pattern of discharges was, therefore, impacted by the AB pair repetition in both  
262 contexts. However, the trial-by-trial comparisons of spike trains evoked by each of the two AB  
263 pairs based on the Pearson correlation coefficient indicated a significant difference between  
264 ABAB-Same and -Var series (paired t-test,  $t_{55} = -2.07$ ,  $p = 0.043$ ; Fig. 5c) with a higher effect  
265 of the AB pair repetition on temporal pattern of spike trains in ABAB-Var series. These results  
266 therefore provide evidence of an impact of the context on auditory responses in NCM.

267

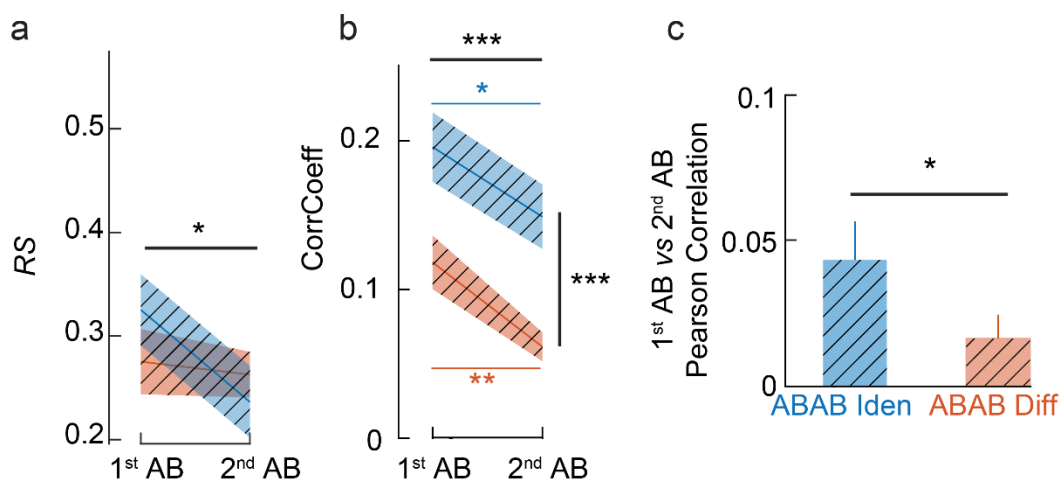

Figure 5

268

269

## 270 Discussion

271 Across renditions, vocal signals acoustically vary, raising the question whether these variations  
272 are detected and play functional roles. Subtle natural variations in fine acoustic structure of  
273 song syllables can be behaviorally discriminated by adult zebra finches<sup>11</sup>. Our study provides  
274 evidence that these variations are encoded by neurons of a high-level auditory area, as indicated  
275 by spike train reliability that differ depending on whether acoustic details vary across iterations.

276 With regard to the functional role, we aimed at investigating the impact of natural variations  
277 on the adaptation of neural responses to a repeated stimulus, that is considered as playing a role  
278 in auditory memory formation through the binding of auditory objects, a crucial processing of  
279 the auditory scene analysis<sup>37</sup>. Up to now, no repeated stimuli used in stimulus-specific  
280 adaptation paradigm exhibited any natural variations leaving unclear the outcome of the present  
281 study. Zebra finches intensively repeat their vocalizations with slight variations across  
282 renditions. One possible prediction was that natural variations prevented or slowed down  
283 changes in auditory responses with stimulus repetition because variants are encoded as distinct  
284 stimuli. In such a case, regarding the functional role of the adaptation, the change in adaptation  
285 rate could be viewed as maintaining the stimulus detection despite its repetition and beyond  
286 that, a focus on individual's vocalizations. Another outcome would be no influence of  
287 variations in the time course of responses because the tolerance of NCM neurons allows them  
288 to encode a stimulus as an object regardless acoustic variation. Our results provide support to  
289 both predictions. Depending on the time scale, the impact of variations on both responses and  
290 the time course of the adaptation differed. This is consistent with studies reporting that cortical  
291 auditory neurons exhibiting stimulus-specific adaptation shows a sensitivity to auditory stimuli  
292 that operates at multiple time scales concurrently, spanning many orders of magnitude<sup>38</sup>.

293 When responses were calculated from firing rates averaged over the entire sequence duration,  
294 they showed no clear impact of slight variations in acoustic features of syllables. Responses  
295 showed a decrease with stimulus repetition, as described in high-level auditory areas in  
296 mammals<sup>39,40</sup> or songbirds<sup>17,19,20,22,24,41,42</sup>. Importantly, this decrease did not depend on whether  
297 variants or same sequences were broadcasted. We reported a similar adaptation rate when  
298 greater changes in response magnitude occurred, *i.e.*, during the first presentations of the  
299 auditory stimuli. This suggests that, at the sequence duration time scale, responsive neurons  
300 encode entire sequences as unique objects, independently of the natural acoustic variations of  
301 syllables. Consistently, a few studies have previously reported invariance in auditory responses

302 of NCM neurons<sup>13</sup>, even when song stimuli were played back in an environmental background  
303 noise<sup>29</sup>. From a temporal perspective, the tolerance of responses to natural acoustic variations  
304 does not imply that the length of the time window integrating acoustic information into a single  
305 object requires the entire sequence duration. Analysis of temporal patterns of spike trains by  
306 varying the Gaussian window width over which convolutions were performed indicated no  
307 difference in responses to playbacks of variants and same sequences when time scale exceeded  
308 ~100 ms. Consistently, a peak invariance around 150 ms after onset of different call-types has  
309 been reported in the avian auditory cortex including the NCM<sup>13</sup>.

310 Importantly, the present study also provides evidence that, at a short timescale, neuronal  
311 responses reflect an impact of the variability in acoustic features of syllables across renditions.  
312 Temporal reliability of spike trains was lower when the fine acoustic structure of syllables  
313 varied. Also, the time course of the spike train reliability across stimuli differed depending on  
314 whether variant or same sequences were played back. The CorrCoef values indeed decreased  
315 when the same sequence was used as recurring stimulus while they remained similar when  
316 sequences acoustically varied. These results cannot be explained by a lack of temporal  
317 organization within spike trains evoked by playbacks of variants that could not allow any  
318 decrease in spike timing reliability. Although CorrCoef values were low, they were higher than  
319 those for randomly organized spike trains. Also, from the first to the second AB pair within  
320 ABAB sequences, CorrCoef values decreased even when sequence variants were used as  
321 stimuli. An explanation based on differences in firing rates can also be excluded, the CorrCoef  
322 values being independent on the firing rate<sup>26</sup>. Moreover, the firing rate similarly decreased with  
323 stimulus repetition even when sequences acoustically varied across renditions. We rather  
324 propose that the temporal resolution of spike trains greatly differed depending on whether  
325 variants or same sequences were used as stimuli. To compute CorrCoef measures, we  
326 performed a convolution of each spike train with a Gaussian window width ranging from 1 to  
327 200 ms. Interestingly, CorrCoef values reached a plateau with a width of about 10 ms when the  
328 same sequence was used as repeated stimulus. This implies that the temporal precision of spike  
329 trains evoked by similar sequences occurred in a time scale of about 10 ms. In contrast, no clear  
330 plateau was reached for spike trains evoked by varying sequences up to 200 ms.

331 One property of NCM neurons that makes their auditory responses complex is their non-linear  
332 integration of acoustic information. The adaptation of responses with stimulus repetition  
333 exemplifies this property<sup>20,29,43</sup>. Consistently, we did not find any significant correlation  
334 between the temporal patterns of the spike trains acoustic measures (*i.e.*, pitch, entropy,



335 similarity score). The lack of a direct contribution of one or a combination of acoustic features  
336 in auditory responses of neurons in a high-order brain area may result from a sensitivity to the  
337 context in which sound stimuli occurs<sup>20,29,43</sup>. For example, manipulating the temporal order of  
338 syllables within songs affected neuronal responses to a given song syllable, neuronal activity  
339 depending on which syllable immediately preceded<sup>20</sup>. Here, the repetition of the same AB pair  
340 within ABAB sequences offered us the opportunity to examine the impact of global context,  
341 variants *vs.* same sequences. The difference observed in temporal patterns of spike trains  
342 between the first and the second pair according to the global context provided new support to  
343 the idea that neuronal responses in NCM reflect a long-term integration of auditory information  
344 that exceeds several hundreds of milliseconds, *i.e.*, the time period between the AB pairs of  
345 two consecutive sequences. Therefore, NCM neurons were not only sensitive to the fine  
346 acoustic structure of syllables, but also to the global context in which syllables occurred.  
347 Consistently, such an interplay among multiple time scales in the integration of information  
348 was previously described in the auditory cortex of humans<sup>44</sup> and non-human mammalian  
349 species<sup>38,45</sup> as well as in visual areas<sup>47-49</sup>. Here, a temporal integration scale means the time  
350 window during which neurons are sensitive to auditory stimuli, which is different from the time  
351 window that can be used to best discriminate between auditory stimuli.

352 Finally, NCM could provide neural mechanisms to extract critical perceptual information  
353 through different types of neural computations based on distinct temporal integration periods:  
354 one to provide precise temporal information, one to allow a category to be assigned to the sound  
355 stimulus and one to integrate the global context in which sounds occur. These can be related to  
356 the richness of behaviorally relevant information encoded in vocal signals, calls and songs<sup>11,46-</sup>  
357 <sup>48</sup> and to the richness of their temporal structure over multiple time scales<sup>49,50</sup>, as music and  
358 speech sounds<sup>51</sup>. A hypothesis based on multiple time integration periods has been proposed  
359 for speech and, beyond that, as a general mechanism for audition<sup>44,52,53</sup>.

360 In summary, our study shows that neurons in a non-primary cortex-like auditory region  
361 exhibited sensitivity to fine natural acoustic variations in song elements as well as sensitivity  
362 to the context in which song elements occurred, here variants *vs.* similar sequences, suggesting  
363 a temporal integration of auditory information across short as well long distinct time scales.

364

365

## 366 **Methods**

### 367 Subjects and housing conditions

368 The subjects were eleven adult male zebra finches (*Taeniopygia guttata*), reared socially in the  
369 breeding colony of the Paris-Saclay University. Birds were kept under a 12:12 light-dark cycle,  
370 with food and water *ad libitum*, and an ambient temperature of 22-25°C. Experimental  
371 procedures were carried out in compliance with national (JO 887–848) and European  
372 (86/609/EEC) legislation on animal experimentation, and following the guidelines used by the  
373 animal facilities of Paris-Sud University (Orsay, France), approved by the national directorate  
374 of veterinary services (# D91-429).

### 375 Auditory stimuli

376 Zebra finch song syllables can be categorized into distinct syllable types. To build auditory  
377 stimuli, we first selected song syllable types from our collection of song bouts previously  
378 recorded (sampling rate: 32 kHz) from adult male zebra finches that had lived in the  
379 laboratory's aviary for years before the experiment. Birds used in the present study had never  
380 been exposed to these songs prior to the electrophysiological investigation. A total of 81  
381 syllable types and 60 renditions of each of them were extracted from the bird's repertoire of  
382 twelve male zebra finches. From this dataset, we chose two distinct syllable types, called 'A'  
383 and 'B', that could have been sung by a single or two individuals, to form ABAB sequence  
384 stimuli of  $0.70 \pm 0.30$  s duration with 30-50 milliseconds as inter-syllable silence intervals, as  
385 typically found in zebra finch songs. Syllable duration ranged from 57 to 235 milliseconds  
386 (mean  $\pm$  SD:  $134.2 \pm 39.6$ ). Then, we built ABAB-Same series that each consisted of 60  
387 repetitions of a given ABAB sequence (see an example of a ABAB sequence stimulus, called  
388  $A_1B_1A_1B_1$ , in Fig.1) and ABAB-Var series that each consisted of 60 variants of a given ABAB  
389 sequence. Variants were labelled as from  $A_1B_1A_1B_1$  to  $A_{60}B_{60}A_{60}B_{60}$  (Fig. 1). Seven ABAB-  
390 Same series and eight ABAB-Var series were built. We used Sound Analysis Pro 2011 <sup>21</sup> to  
391 compute the accuracy score (Fig 1c), which provides a fine-grained quantification of the  
392 acoustic similarity, between each renditions of the A and B syllables for each sequences of the  
393 ABAB-Same and ABAB-Var series, *i.e.* syllables A vs A, B vs B, A vs B. For the ABAB-Same  
394 series for which syllables A and B within a sequence were always the same, an ANOVA  
395 revealed a significant difference of the average accuracy scores of the syllables ( $F_{2,28} = 222.9$ ,  
396  $p < 0.001$ ) and a post-hoc Tukey HSD multiple comparison analysis revealed that it was  
397 significantly lower for syllables A vs B (average accuracy score = 73.5%) than for syllables A

398 vs A (100%) and B vs B (100%). For the ABAB- Var series, for which there were 60 variants  
399 of the A and B syllables, an ANOVA revealed a significant difference of the average accuracy  
400 scores of the syllables ( $F_{2,25} = 13.93$ ,  $p < 0.001$ ) and a post-hoc Tukey HSD multiple  
401 comparison analysis revealed that it was significantly lower for syllables A vs B (average  
402 accuracy score = 69.2%) than for syllables A vs A (82.8%) and B vs B (82.4%). None of the  
403 ABAB sequences used to build ABAB-Same series were used in ABAB-Var series. All  
404 sequences in both series types started with the same introductory note. When a series was  
405 played back, sequence stimuli were delivered at a rate of one per second.

#### 406 Electrophysiological recordings

407 Neuronal activity in NCM was recorded in awake (n=4) and in anesthetized (n=7) adult male  
408 zebra finches while presenting at least one ABAB-Same and one ABAB-Var series.

#### 409 Acute recordings

410 Birds were anesthetized with isoflurane gas (in oxygen; induction: 3%, maintenance: 1.5%)  
411 that flowed through a small mask over the bird's beak. The bird was immobilized in a custom-  
412 made stereotaxic holder that allowed the head to be tilted at 45° and placed in a sound  
413 attenuation chamber. Lidocaine cream was applied to the skin. A window was opened in the  
414 inner skull layer and small incisions were made in the dura. A multi-electrode array of eight or  
415 16 tungsten electrodes (1-2 MΩ impedance at 1 kHz; Alpha Omega Engineering, Nazareth,  
416 Israel) that consisted of two rows of four or eight electrodes separated by 100 μm apart, with  
417 100 μm between electrodes of the same row was lowered to record extracellular activity. The  
418 array was positioned 0.3–0.5 mm lateral and 0.7–0.9 mm rostral to the bifurcation of the sagittal  
419 sinus in either the left or the right hemisphere, with a micromanipulator, as in previous studies  
420 <sup>15,16,20,22</sup>. The probe was lowered very slowly until electrode tips reached 1200 μm below the  
421 brain surface. From 1200 to 1900 μm below the brain surface, auditory stimuli were delivered  
422 when the amplitude of action potential waveforms recorded with at least one of the eight  
423 electrodes was clearly distinct from background noise. Recording sites were at least 100 μm  
424 apart to minimize the possibility that the neural activity recorded from two successive sites  
425 originated from the same single units. Electrode signals were amplified and filtered (gain  
426 10,000; bandpass: 0.3–10 kHz; AlphaLab SnR, AlphaOmega LTD) to extract multi-unit  
427 activity. During recordings, voltage traces and action potentials were monitored in real time  
428 using the AlphaLab SnR software. Auditory stimuli were concomitantly recorded and digitized

429 to precisely determine the onset of NCM responses with respect to the sound stimulus. While  
430 spiking activity was recorded, auditory stimuli were broadcasted through a loudspeaker  
431 situated 30 cm from the bird's head. We played back one ABAB-Same and one ABAB-Var  
432 series. From one recording site to the following one, because of the habituation phenomenon  
433 in NCM, we changed the set of series used as auditory stimuli and the order of series. All  
434 stimuli had been normalized to achieve maximal amplitude of 70 dB (Audacity software) at  
435 the level of the bird's head. Spike sorting of neuronal activity was done offline (see below).

#### 436 Chronic recordings

437 Surgical procedures were similar as described above. To perform chronic recordings in awake  
438 birds, we used a custom build screw microdrive that allows a microelectrode array to be  
439 dorsally repositioned. We used arrays of eight electrodes (two rows of four electrodes separated  
440 by 100  $\mu\text{m}$  apart; with a ground silver wire and a reference wire; 1-2  $\text{M}\Omega$  impedance at 1 kHz;  
441 Alpha Omega Engineering, Nazareth, Israel). Once the array was lowered into the brain to a  
442 depth of 1200  $\mu\text{m}$ , the reference wire was inserted between the outer and the inner skull layers.  
443 The microdrive was secured to the skull using dental cement. Subjects were allowed to recover  
444 for a few days. In the sound-attenuation chamber, the implanted microdrive was connected  
445 through a commercial tether and head stage (AlphaOmega) to a mercury commutator located  
446 on the roof of the cage (Dragonfly systems). An elastic thread built into the tether helped to  
447 support the weight of the implant. Subjects remained tethered during the experiment. The screw  
448 drive held the electrode array. Each full turn of the screw advanced the array by 200 microns.  
449 Before a recording session, we rotated the screw by  $\frac{1}{2}$  turn to advance the microelectrode array  
450 in step as  $\sim 100$  microns. Birds were not freely moving during the recording session. They were  
451 restrained with a jacket around their bodies. At least 24 hours separated two recording sessions.  
452 From one recording session to the following one, we changed the set of series used as auditory  
453 stimuli.

#### 454 Data processing and analysis

455 In anesthetized birds, spike sorting was performed using the template-matching algorithm of  
456 the Spike2 software (version 8.0, Cambridge Electronic Design, CED, Cambridge, UK). NCM  
457 contains at least two populations of neurons that can be distinguished on the width of the spike  
458 waveform and the firing rate<sup>20,29,30</sup>, so restricted our analyses to well-isolated units. In awake  
459 birds, neural traces of multiunit activity were subjected to threshold spike detection. Responses  
460 to stimuli were quantified by calculating averaged firing rates during sequence presentation

461 and by computing the  $RS$  index<sup>15, 22,54</sup>. The  $RS$  index was calculated by subtracting the  
462 spontaneous firing rate ( $B_{FR}$ ) from the evoked firing rate ( $E_{FR}$ ) and then by dividing this value  
463 by their sum:

$$464 \quad RS = \frac{E_{FR} - B_{FR}}{E_{FR} + B_{FR}}$$

465  $RS$  values fall between +1 and -1, where values  $>0$  indicate an excitatory response and values  
466  $<0$  indicate an inhibitory response. The  $B_{FR}$  was measured over the 200 ms period preceding  
467 the stimulus onset. We calculated  $RS$  values for the 60 renditions of sequence stimuli and per  
468 block of 10 presentations, giving us 6 values per series (one per block of ten iterations of the  
469 stimulus). Note that for the ABAB-Var series, each block includes 10 variants of the auditory  
470 stimuli. Auditory responses to a stimulus in NCM decrease rapidly with stimulus repetition. To  
471 examine whether the stimulus-specific adaptation differed between ABAB-Same and -Diff  
472 series, we computed a stimulus-specific adaptation rate from responses ( $E_{FR}$ ) to the 10 first  
473 stimulus renditions by extracting the slope of the linear regression for each unit<sup>17,23-25</sup>.

474 The temporal pattern of responses evoked by both types of songs was quantified by calculating  
475 the spike-timing reliability coefficient (CorrCoef), which was used to quantify the iteration-to-  
476 iteration reliability of responses. It was computed a) per block of ten stimulus iterations and b)  
477 per iteration: it corresponds to the normalized covariance between each pair of action potential  
478 trains and was calculated as follows:

$$479 \quad CorrCoef = \frac{1}{N(N-1)} \sum_{i=1}^{N-1} \sum_{j=i+1}^N \frac{\sigma x_i x_j}{\sigma x_i x_j'}$$

480 where  $N$  is the number of iterations, and  $x_i x_j$  is the normalized covariance at zero lag between  
481 spike trains  $x_i$  and  $x_j$ , where  $i$  and  $j$  are the iteration numbers. Spike trains  $x_i$  and  $x_j$  were  
482 previously convolved with a width of the Gaussian window ranging from 1 to 200 ms. In the  
483 present study, most analyses were based on CorrCoef values calculated from a convolution  
484 with a 10 ms Gaussian window width,<sup>20</sup>. The CorrCoef was used because this index is not  
485 influenced by fluctuations of firing rate (Gaucher et al, 2013). Note that we also computed  
486 CorrCoef values from spikes trains after performing a random permutation of the time at which  
487 occurred individual spikes during each stimulus rendition. This random permutation thus gave  
488 us an estimation of the CorrCoef when spikes timing is randomly distributed.

489 Spike-timing reliability might be impacted by the variation of syllables' duration across each  
490 rendition of the ABAB-Var sequences. Given that, we performed a linear time warping of each  
491 syllable so that all renditions of an ABAB-Var sequence were aligned on the same time axis  
492 <sup>55</sup>. Syllable boundaries were automatically detected according to the threshold crossing of the  
493 root-mean square of the amplitude of each rendition. We extracted the maximum duration of  
494 A and B syllables within the sequence and used it as a reference timing. We then linearly  
495 stretched or compressed each syllable to match its duration to the maximum duration of its  
496 reference. Each individual spike train was then projected to the time warped axis of the  
497 corresponding syllable. This algorithm thus reduces the temporal variation of the spike trains  
498 from one trial to another.

499 To examine whether CorrCoef values depended on acoustic variability from one variant to  
500 another, we quantified differences in acoustic features and degree of similarity between all  
501 variants used to build a given ABAB-Var series with SAP 2011 <sup>21</sup>. From CorrCoef values  
502 computed from spike trains evoked by the two variants used in comparisons, we performed  
503 linear regressions.

504 Statistical computations were carried out in R (4.0.2) and MATLAB (2020a). Firing rates, *RS*  
505 and CorrCoef values were analyzed using either repeated measures (RM) ANOVA in Linear  
506 Mixed Models (R package 'nlme' version 3.1-152) or paired T-tests (R package 'stats' version  
507 4.1.0). Depending on the analysis, the block repetition (n=6), the series type (ABAB-Same *vs.*  
508 ABAB-Var) and/or AB pair identity (the first *vs.* the second one) were included as cofactors in  
509 the model. We used planned contrast and least-square means adjusted with the Tukey HSD  
510 tests for assessing pair-wise differences (emmeans function from R package 'emmeans' version  
511 1.6.1).

## 512 Histology

513 At the end of each experiment, the animal was euthanized with a lethal dose of pentobarbital  
514 and the brain quickly removed from the skull and placed in a fixative solution (4% para-  
515 formaldehyde). Sections (100  $\mu$ m) were cut on a vibratome to examine the location of  
516 multielectrode array penetration tracks.

517

518



519 References

- 520 1. Tibbetts, E. A. & Dale, J. Individual recognition: it is good to be different. *Trends Ecol*  
521 *Evol* **22**, 529–537 (2007).
- 522 2. Hall, J. A., Horgan, T. G. & Murphy, N. A. Nonverbal communication. *Annu Rev Psychol*  
523 **70**, 271–294 (2019).
- 524 3. Meliza, C. D. & Margoliash, D. Emergence of selectivity and tolerance in the avian  
525 auditory cortex. *J Neurosci* **32**, 15158–15168 (2012).
- 526 4. Kanwal, J. S. & Rauschecker, J. P. Auditory cortex of bats and primates: managing species-  
527 specific calls for social communication. *Front Biosci* **12**, 4621–4640 (2007).
- 528 5. Sharpee, T. O., Nagel, K. I. & Doupe, A. J. Two-dimensional adaptation in the auditory  
529 forebrain. *J Neurophysiol* **106**, 1841–1861 (2011).
- 530 6. Liu, S. T., Montes-Lourido, P., Wang, X. & Sadagopan, S. Optimal features for auditory  
531 categorization. *Nat Commun* **10**, 1302 (2019).
- 532 7. Falls, J. B. Individual recognition by sound in birds. in *Acoustic communication in birds*  
533 (eds. Kroodsma, D. E. & Miller, E. H.) vol. 2 237–278 (Academic Press, 1982).
- 534 8. Lambrechts, M. M. & Dhondt, A. A. Individual voice discrimination in birds. in *Current*  
535 *Ornithology* (ed. Power, D. M.) 115–139 (Springer US, 1995).
- 536 9. Hyland Bruno, J. & Tchernichovski, O. Regularities in zebra finch song beyond the  
537 repeated motif. *Behav Proc* **163**, 53–59 (2019).
- 538 10. Woolley, S. C. & Doupe, A. J. Social context-induced song variation affects female  
539 behavior and gene expression. *PLoS Biol.* **6**, e62 (2008).
- 540 11. Fishbein, A. R., Prior, N. H., Brown, J. A., Ball, G. F. & Dooling, R. J. Discrimination of  
541 natural acoustic variation in vocal signals. *Sci Rep* **11**, 916 (2021).
- 542 12. Elie, J. E. & Theunissen, F. E. Meaning in the avian auditory cortex: neural representation  
543 of communication calls. *Eur J Neurosci* **41**, 546–567 (2015).

- 544 13. Elie, J. E. & Theunissen, F. E. Invariant neural responses for sensory categories revealed  
545 by the time-varying information for communication calls. *PLOS Comput Biol* **15**,  
546 e1006698 (2019).
- 547 14. Thompson, J. V. & Gentner, T. Q. Song recognition learning and stimulus-specific  
548 weakening of neural responses in the avian auditory forebrain. *J Neurophysiol* **103**, 1785–  
549 1797 (2010).
- 550 15. Menardy, F. *et al.* Social experience affects neuronal responses to male calls in adult female  
551 zebra finches. *Eur J Neurosci* **35**, 1322–1336 (2012).
- 552 16. Menardy, F., Giret, N. & Del Negro, C. The presence of an audience modulates responses  
553 to familiar call stimuli in the male zebra finch forebrain. *Eur J Neurosci* **40**, 3338–3350  
554 (2014).
- 555 17. Chew, S. J., Mello, C., Nottebohm, F., Jarvis, E. & Vicario, D. S. Decrements in auditory  
556 responses to a repeated conspecific song are long-lasting and require two periods of protein  
557 synthesis in the songbird forebrain. *Proc Natl Acad Sci USA* **92**, 3406–3410 (1995).
- 558 18. Mello, C., Nottebohm, F. & Clayton, D. Repeated exposure to one song leads to a rapid  
559 and persistent decline in an immediate early gene's response to that song in zebra finch  
560 telencephalon. *J Neurosci* **15**, 6919–6925 (1995).
- 561 19. Beckers, G. J. L. & Gahr, M. Neural processing of short-term recurrence in songbird vocal  
562 communication. *PLoS ONE* **5**, e11129 (2010).
- 563 20. Cazala, A., Giret, N., Edeline, J.-M. & Del Negro, C. Neuronal encoding in a high-level  
564 auditory area: from sequential order of elements to grammatical structure. *J Neurosci* **39**,  
565 6150–6161 (2019).
- 566 21. Tchernichovski, O., Nottebohm, F., Ho, C. E., Pesaran, B. & Mitra, P. P. A procedure for  
567 an automated measurement of song similarity. *Anim Behav* **59**, 1167–1176 (2000).

- 568 22. Stripling, R., Volman, S. F. & Clayton, D. F. Response modulation in the Zebra finch  
569 neostriatum: relationship to nuclear gene regulation. *J Neurosci* **17**, 3883–3893 (1997).
- 570 23. Chew, S. J., Vicario, D. S. & Nottebohm, F. A large-capacity memory system that  
571 recognizes the calls and songs of individual birds. *Proc Natl Acad Sci USA* **93**, 1950–1955  
572 (1996).
- 573 24. Phan, M. L., Pytte, C. L. & Vicario, D. S. Early auditory experience generates long-lasting  
574 memories that may subserve vocal learning in songbirds. *Proc Natl Acad Sci USA* **103**,  
575 1088–1093 (2006).
- 576 25. Terleph, T. A., Mello, C. V. & Vicario, D. S. Auditory topography and temporal response  
577 dynamics of canary caudal telencephalon. *J Neurobiol* **66**, 281–292 (2006).
- 578 26. Gaucher, Q., Huetz, C., Gourévitch, B. & Edeline, J.-M. Cortical inhibition reduces  
579 information redundancy at presentation of communication sounds in the primary auditory  
580 cortex. *J Neurosci* **33**, 10713–10728 (2013).
- 581 27. Gaucher, Q. & Edeline, J.-M. Stimulus-specific effects of noradrenaline in auditory cortex:  
582 implications for the discrimination of communication sounds. *J Physiol* **593**, 1003–1020  
583 (2015).
- 584 28. Souffi, S., Lorenzi, C., Varnet, L., Huetz, C. & Edeline, J.-M. Noise-sensitive but more  
585 precise subcortical representations coexist with robust cortical encoding of natural  
586 vocalizations. *J Neurosci* **40**, 5228–5246 (2020).
- 587 29. Schneider, D. M. & Woolley, S. M. N. Sparse and background-invariant coding of  
588 vocalizations in auditory scenes. *Neuron* **79**, 141–152 (2013).
- 589 30. Ono, S., Okanoya, K. & Seki, Y. Hierarchical emergence of sequence sensitivity in the  
590 songbird auditory forebrain. *J Comp Physiol A* 1–21 (2016) doi:10.1007/s00359-016-  
591 1070-7.

- 592 31. Yanagihara, S. & Yazaki-Sugiyama, Y. Auditory experience-dependent cortical circuit  
593 shaping for memory formation in bird song learning. *Nat Commun* **7**, 11946 (2016).
- 594 32. Huetz, C., Del Negro, C., Lebas, N., Tarrow, P. & Edeline, J.-M. Contribution of spike  
595 timing to the information transmitted by HVC neurons. *Eur J Neurosci* **24**, 1091–1108  
596 (2006).
- 597 33. Narayan, R., Graña, G. & Sen, K. Distinct time scales in cortical discrimination of natural  
598 sounds in songbirds. *J Neurophysiol* **96**, 252–258 (2006).
- 599 34. Ribeiro, S., Cecchi, G. A., Magnasco, M. O. & Mello, C. V. Toward a song code: evidence  
600 for a syllabic representation in the canary brain. *Neuron* **21**, 359–371 (1998).
- 601 35. Woolley, S. M. N., Gill, P. R. & Theunissen, F. E. Stimulus-dependent auditory tuning  
602 results in synchronous population coding of vocalizations in the songbird midbrain. *J.*  
603 *Neurosci.* **26**, 2499–2512 (2006).
- 604 36. Laudanski, J., Edeline, J.-M. & Huetz, C. Differences between spectro-temporal receptive  
605 fields derived from artificial and natural stimuli in the auditory cortex. *PLOS ONE* **7**,  
606 e50539 (2012).
- 607 37. Winkler, I., Denham, S. L. & Nelken, I. Modeling the auditory scene: predictive regularity  
608 representations and perceptual objects. *Trends Cogn Sci* **13**, 532–540 (2009).
- 609 38. Ulanovsky, N., Las, L., Farkas, D. & Nelken, I. Multiple time scales of adaptation in  
610 auditory cortex neurons. *J Neurosci* **24**, 10440–10453 (2004).
- 611 39. Malmierca, M. S., Sanchez-Vives, M. V., Escera, C. & Bendixen, A. Neuronal adaptation,  
612 novelty detection and regularity encoding in audition. *Front Syst Neurosci* **8**, (2014).
- 613 40. Khouri, L. & Nelken, I. Detecting the unexpected. *Curr Opin Neurobiol* **35**, 142–147  
614 (2015).

- 615 41. Smulders, T. V. & Jarvis, E. D. Different mechanisms are responsible for dishabituation of  
616 electrophysiological auditory responses to a change in acoustic identity than to a change in  
617 stimulus location. *Neurobiol Learn Mem* **106**, 163–176 (2013).
- 618 42. Lu, K. & Vicario, D. S. Statistical learning of recurring sound patterns encodes auditory  
619 objects in songbird forebrain. *Proc Natl Acad Sci USA* **111**, 14553–14558 (2014).
- 620 43. Lu, K. & Vicario, D. S. Familiar but unexpected: effects of sound context statistics on  
621 auditory responses in the songbird forebrain. *J. Neurosci.* **37**, 12006–12017 (2017).
- 622 44. Teng, X., Tian, X. & Poeppel, D. Testing multi-scale processing in the auditory system.  
623 *Sci Rep* **6**, 34390 (2016).
- 624 45. García-Rosales, F., Beetz, M. J., Cabral-Calderin, Y., Kössl, M. & Hechavarria, J. C.  
625 Neuronal coding of multiscale temporal features in communication sequences within the  
626 bat auditory cortex. *Commun Biol* **1**, 1–14 (2018).
- 627 46. Elie, J. E. & Theunissen, F. E. Zebra finches identify individuals using vocal signatures  
628 unique to each call type. *Nat Commun* **9**, 4026 (2018).
- 629 47. Perez, E. C. *et al.* The acoustic expression of stress in a songbird: does corticosterone drive  
630 isolation-induced modifications of zebra finch calls? *Horm Behav* **61**, 573–581 (2012).
- 631 48. D’Amelio, P. B., Klumb, M., Adreani, M. N., Gahr, M. L. & Maat, A. Individual  
632 recognition of opposite sex vocalizations in the zebra finch. *Sci Rep* **7**, 5579 (2017).
- 633 49. Cynx, J., Williams, H. & Nottebohm, F. Timbre discrimination in zebra finch (*Taeniopygia*  
634 *guttata*) song syllables. *J Comp Psychol* **104**, 303–308 (1990).
- 635 50. Lohr, B., Dooling, R. J. & Bartone, S. The discrimination of temporal fine structure in call-  
636 like harmonic sounds by birds. *J Comp Psychol* **120**, 239–251 (2006).
- 637 51. Rosen, S., Carlyon, R. P., Darwin, C. J. & Russell, I. J. Temporal information in speech:  
638 acoustic, auditory and linguistic aspects. *Philosophical Transactions of the Royal Society*  
639 *of London. Series B: Biological Sciences* **336**, 367–373 (1992).

- 640 52. Poeppel, D. Pure word deafness and the bilateral processing of the speech code. *Cogn Sci*  
641 **25**, 679–693 (2001).
- 642 53. Poeppel, D. The analysis of speech in different temporal integration windows: cerebral  
643 lateralization as ‘asymmetric sampling in time’. *Speech Commun* **41**, 245–255 (2003).
- 644 54. Giret, N., Menardy, F. & Del Negro, C. Sex differences in the representation of call stimuli  
645 in a songbird secondary auditory area. *Front. Behav. Neurosci.* **9**, 290 (2015).
- 646 55. Kao, M. H., Wright, B. D. & Doupe, A. J. Neurons in a forebrain nucleus required for vocal  
647 plasticity rapidly switch between precise firing and variable bursting depending on social  
648 context. *J. Neurosci.* **28**, 13232–13247 (2008).
- 649
- 650



651 Acknowledgements

652 This work was supported by the Centre National de la Recherche Scientifique, the IDEX Neuro-  
653 Saclay, and the University of Paris Sud. N.G. was supported by IDEX Neuro Saclay Postdoctoral  
654 Fellowship. A.C., was supported by the French Ministry of Research and Technology. We  
655 thank Chloé Huetz for help in analyzing the data and Jean-Marc Edeline for advices on data  
656 interpretation. We thank Mélanie Dumont and Caroline Rousseau for taking care of the  
657 songbird facility.

658 Author contributions: A.C., N.G., and C.D.N. performed research; A.C., N.G., and C.D.N.  
659 analyzed data; N.G. and C.D.N. designed research; N.G. and C.D.N. edited the paper; N.G.  
660 wrote the paper.

661 Competing interests policy: The authors declare no conflict of interest.

662

663 Data availability

664 Data will be made available upon reasonable request.

665 Table caption

666 Figure captions

667 Figure 1: A single sequence or sequences with natural variations found in individual's songs  
668 were used to build two series types: ABAB-Same and ABAB-Var series. a) Schematic diagram  
669 of the structure of ABAB-Same (top) and ABAB-Var (bottom) series. A and B depict two  
670 syllable types used to form ABAB sequences. The ABAB-Same series consisted of 60  
671 repetitions of a single ABAB sequence while the ABAB-Var series consisted of 60 distinct  
672 renditions of a given ABAB sequence. These renditions called sequence "variants" were  
673 labelled as  $A_nB_nA_nB_n$  ( $n$  varying from 1 to 60).  $A_n$  and  $B_n$  were distinct exemplars of a single  
674 syllable type that were extracted from the song's repertoire of a given individual. Each  
675 sequence was presented at a rate of one per second. b) Example spectrograms of two  
676 consecutive sequences within an ABAB-Same (i, no variants) and ABAB-Var (ii, variants)  
677 series. Note the subtle changes between  $A_1B_1A_1B_1$  and  $A_2B_2A_2B_2$  sequences of the ABAB-Var  
678 serie (e.g. power at ~5kHz on syllable B. Underneath each spectrogram are the accuracy scores  
679 (%) computed with SAP 2011 (see main text for further details) between A and B syllables  
680 across the two successive example renditions of the ABAB-Same and ABAB-Var sequences.  
681 c) Mean (+/- STD) of the accuracy scores computed between A and B syllables across the 60  
682 renditions of all the ABAB-Same (top) and ABAB-Var (bottom) sequences. \*\*\*  $p < 0.001$ .

683 Figure 2: Auditory responses to 60 repetitions of a single sequence (ABAB-Same series) and  
684 to 60 sequence variants (ABAB-Var series) in awake birds. Responses of a representative unit  
685 to the ABAB-Same (a) and the ABAB-Var (b) series used as auditory stimuli. Neuronal  
686 responses are shown as raster plots (60 iterations) and peristimulus time histograms (bottom;  
687 10 ms bin width; for the 10 first and the 10 last trials) that are time-aligned with sequence  
688 spectrograms (top: the sequence repeated 60 times for the ABAB-Same example series and one  
689 sequence variant for the ABAB-Var example series). (c) Modulation of responses over the 6  
690 successive blocks of ten trials (blocks for the ABAB-Var series include 10 variants of the  
691 auditory sequence). The  $RS$  values estimated the strength of the responses driven by the series  
692 used as auditory stimulus. Thick line indicates mean responses for the population of recording  
693 sites ( $n=56$ ). Hatched area represents SEM. (d) Adaptation rate (mean  $\pm$  SEM) of responses  
694 computed over the 10 first trials did not significantly differ between the two series. (e)  
695 Reliability of spike trains illustrated by heatmaps (right: ABAB-Same series; left: ABAB-Var  
696 series). Spike trains reliability, quantified by the CorrCoef index, was lower when sequence

697 variants were presented. Blue color indicates low CorrCoef values. (f) At the population level,  
698 differences in spike-timing reliability and in its time course between the two series. CorrCoef  
699 values were computed from spike trains evoked by the first ten trials and those evoked by the  
700 ten trials of the six blocks (block 1 to 6). CorrCoef computed for block 1 vs 1 is not equal to 1  
701 because it is computed on each iteration (e.g. iteration  $m$  vs iteration  $n$ , with  $m$  and  $n$  ranging  
702 from 1 to 10). Significant difference: \*  $p < 0.05$ , \*\*  $p < 0.01$ , \*\*\*  $p < 0.001$  (see main text for  
703 statistics details).

704 Figure 3: Auditory responses in anesthetized birds. From rendition to rendition, spike timing  
705 greatly changed when sequence variants were played back. No such changes were observed  
706 when the same sequence was repeated (ABAB-Same series). Neuronal responses of a  
707 representative single unit to playback of one ABAB-Same (a) and one ABAB-Var (b) series  
708 are shown as raster plots (60 iterations) and peristimulus time histograms (bottom; 10 ms bin  
709 width; for the 10 first and the 10 last trials) that are time-aligned with sequence spectrograms  
710 (top: the sequence repeated 60 times for the ABAB-Same example series and one sequence  
711 variant for the ABAB-Var example series). c) ABAB-Same series evoked higher responses ( $RS$   
712 values) than ABAB-Same series at the population level (left) and for the sub-population of  
713 narrow spike cells (right), but not for broad spike cells (middle). Thick line indicates mean  
714 values and shaded area represents SEM. d) Response strength differed, but similarly changed  
715 with repeated exposure to sequences, as indicated by the adaptation rate computed over the  
716 first ten stimuli presentations (mean  $\pm$  SEM). e) As observed in awake birds, spike train  
717 reliability differed between the two series, with a higher spike timing accuracy when the same  
718 sequence (ABAB-Same) was repeated. Heatmaps from CorrCoef values computed per block  
719 of 10 stimuli renditions. f) Corrcoef (mean  $\pm$  SEM) changed with stimulus exposure when the  
720 same sequence was repeated while it remained similar when sequence variants were played  
721 back. Corrcoef values were higher than those of spike trains in which spike timing was  
722 randomly permuted. g) Varying the Gaussian window width used to compute the convolution  
723 of spike trains from 1 to 200 ms affects CorrCoef values. In the present study, a 10 ms Gaussian  
724 window width to compute CorrCoef values (vertical dashed line) and Corrcoef values differed  
725 between the two series. No difference between ABAB-Same and ABAB-Var was observed  
726 when the time window exceeds 98 ms. CorrCoef values were also computed on spike trains  
727 after a random permutation of the spike timing. Thick line indicates mean values; shaded area  
728 represents SEM. Significant difference: \*  $p < 0.05$ , \*\*  $p < 0.01$ , \*\*\*  $p < 0.001$ .

729 Figure 4: No correlation between variability in acoustic features and spike timing reliability.  
730 a) Response strength in both anesthetized (open boxes) and awake birds (dashed boxes) did not  
731 depend on the exemplar of series used as stimuli, *i.e.* on the syllable types used to form  
732 sequences within the series. Eight ABAB-Var series and seven ABAB-Same series were used  
733 as stimuli. Numbers in black and grey below bars indicates how many times the corresponding  
734 playback file was used and how many neurons of the overall population of recorded neurons  
735 responded to the series type, respectively. Note that the ABAB-Var series labelled as S8 that  
736 induced the greatest auditory response was presented only once. b-d) Linear regression between  
737 differences in similarity scores (b), entropy (c) and pitch (d) from the first sequence exemplar  
738 of the ABAB-Var series and one of the 59 following ones *vs* CorrCoef values, computed from  
739 the spike train evoked by the first sequence rendition and one of the 59 following ones, the  
740 same as used to quantify acoustic differences. The thick line represents the slope of the  
741 regression; Pearson's  $r$  and  $p$  values on each plot; green dot: averaged CorrCoef values.

742 Figure 5: Responses to the two AB pairs that form ABAB sequences reflects sensitivity to the  
743 context in awake birds. (a) Strength of responses ( $RS$  values) changed from the first AB pair to  
744 the second one. The exposure to the first pair of syllables AB impacts the responses to the  
745 second pair of syllables AB within a stimulus rendition in both anaesthetized and awake birds.  
746 Evoked auditory responses (a) and CorrCoef (b) were overall higher for ABAB-Same than for  
747 ABAB-Var sequences and were lower for the second pair of syllables AB than for the first pair.  
748 Yet, Pearson correlation coefficient measured on each individual spike train between the first  
749 and second pair of syllables AB was lower for ABAB-Var than ABAB-Same sequences (c). \*,  
750 \*\*, and \*\*\*,  $p < 0.05$ ,  $0.01$  and  $0.001$ , respectively (see main text for statistics details).

751
